# Supplementary material
Source: publisher figshare collection journal article supplement (https://wiley.figshare.com/articles/dataset/_/3518996)
Supplement: Supplementary file 1 [file 1 › appendix-A.htm]

Ecological Archives A024-001-A1


*Ecological Archives* A024-001-A1

Inés Ibáñez, Jeffrey M. Diez, Luke P. Miller, Julian D. Olden, Cascade J. B. Sorte, Dana M. Blumenthal, Bethany A. Bradley, Carla M. D'Antonio, Jeffrey S. Dukes, Regan I. Early, Edwin D. Grosholz, Joshua J. Lawler. 2014. Integrated assessment of biological invasions. *Ecological Applications* 24:25–37. http://dx.doi.org/10.1890/13-0776.1

Appendix A. Detailed description of the case studies, data, models, and additional results.

> View /download PDF.


---

[Back to A024-001]
