# Supplementary material
Source: publisher figshare collection journal article supplement (https://wiley.figshare.com/articles/dataset/_/3518996)
Supplement: Supplementary file 1 [file 1 › appendix-A.pdf]

## APPENDIX

### CASE STUDY 1: *Celastrus orbiculatus*

#### **Step 1: Data synthesis - Linking the invasion process to population demography**

To compile all the data available on this species within its invasive range in North America, we first carried out a literature search, using the database *Web of Science*, of all the experimental and observational work published about *C. orbiculatus* in scientific journals (Table A-1). Information ranged from distribution data, e.g., presence and abundance, to population germination and establishment rates, and individual growth rates. We selected two response variables, presence and abundance of *C. orbiculatus*, that were based on geographically referenced data available through the Invasive Plant Atlas of New England (Mehrhoff et al. 2003;  $N = 4200$  observations). This data set also provided the data source for constructing the model, i.e. information on the specific characteristics of each site (habitat type, canopy closure and soil moisture), and the fact that it is geographically-referenced allowed us to link each observation to climate and land use land cover (LULC) data (Ibáñez et al 2009a,b).

Next we organized this information by assigning each information source to a specific context, species, habitat or system (Foxcroft et al. 2011), and to each of the stages defined as part of the demographic framework (Table A1). We also kept track of the organismal or spatial scale at which information was collected.

#### **Step 2: Data-model model integration using hierarchical models**

We tried different models that varied in the level of information included, from a simple generalized linear model using only climate data to a more complex framework that included a large portion of the information found in the literature search. We used the Deviance Information

Criterion, DIC (Spiegelhalter et al. 2000) to select the model that best fit the data (Table A2). We describe below the final model used in the integrated assessment analysis.

Given our knowledge of the invasion, e.g., *C. orbiculatus* populations associated to particular landscape features (e.g., Albright et al. 2009, Kelly et al. 2009) and to specific habitats (Ibáñez et al. 2009a,b), we estimated the probability of the species being present at site  $i$ ,  $\pi_i$ , as a function of the independent probabilities that determine propagule availability ( $pr$ ), suitability of the site ( $su$ ), germination ( $ger$ ) and establishment ( $est$ ).  $Y$  denotes the data, 0 if absent and 1 if present:

$$Y_i \sim \text{Bernoulli}(\pi_i)$$

$$\pi_i = pr_i su_i ger_i est_i$$

Propagule availability ( $pr$ ) was calculated as a function of developed land around the sample point to reflect the association of *C. orbiculatus* populations with human development in the landscape. Beside the fix effect coefficients,  $\alpha_*$ , we also included a spatial random effect ( $\omega$ ). This spatial effect had a double function here; it allowed us to account for any spatial autocorrelation in the data, and, as this species is still moving through the landscape and some of the absences in the data may not be true absences, this term also took into account that an area may not have been invaded yet even if the conditions were suitable for colonization (Ibáñez et al. 2009a):

$$\text{logit}(pr_i) = \alpha_1 + \alpha_2 \% \text{ developed land}_i + \omega_i$$

Suitability of a site was modeled as a function of habitat type nested within climate, i.e., climate's impact on the suitability of a site depended on the type of habitat. Again this reflects information gathered from the literature search; open habitats reduced winter survival of first-year seedlings, while survival in later stages was greater under open canopies (Ellsworth et al.

2004a). The hierarchical structure allowed us to account for the fact that a change in temperature in closed canopy forests may have much less of an impact than similar changes in an open habitat:

$$\begin{aligned} \text{logit}(su_i) = & \beta_0 + \beta_{1,k(i)} \text{summer temperature}_i + \beta_{2,k(i)} \text{winter temperature}_i + \\ & \beta_{3,k(i)} \text{annual precipitation}_i + \beta_{4,k(i)} \text{precipitation seasonality}_i \\ & + \beta_{5,k(i)} \text{summer precipitation}_i \end{aligned}$$

Here the fixed effects coefficients associated to each covariate,  $\beta$ , are estimated for each habitat type,  $k$ , so for example the effect of winter temperature can vary among habitat types. We then estimated these parameters from prior distributions with parameters,  $\beta_j$  and  $\sigma^2_{\beta_j}$ , which represent the overall response of the species to that variable:

$$\beta_{j,k} \sim \text{Normal}(\beta_j, \sigma^2_{\beta_j})$$

This approach is useful because we can predict suitability of specific habitats using parameters  $\beta_{j,k}$ , or across all habitats, using  $\beta_j$  and  $\sigma^2_{\beta_j}$ ; at the same time, and we can compare the effects of climate variables among habitat types. When examining suitability, parameter  $\sigma^2_{\beta_j}$  accounts for the variability in the response found among habitat types.

Germination and establishment rates were not estimated, but values were drawn from distributions that reflect the outcome of previous experimental studies (Dreyer et al. 1987, Ellsworth et al. 2004b). Variability around those estimates was included in the analysis to help account for the different sources of uncertainty inherent in the presence/absence data:

$$ger_i \sim \text{Uniform}(0.55, 0.75)$$

$$est_i \sim \text{Uniform}(0.8, 1)$$

Percent cover– our proxy for proliferation – was recorded in six ordinal categories. To analyze these data, we then used a proportional odds model (McCullagh 1980, Cox 1995). Cover was analyzed as a function of both site suitability, as described above, and site conditions, i.e., light and soil moisture availability. Here again we used a hierarchical structure to estimate the effects of canopy closure nested within soil moisture level. Empirical work shows the influence of water and light availability on growth rates (Leicht and Silander 2006), and as these two variables do not act independently we decided to model the effects of light availability nested within the soil moisture level ( $s$ ) of a particular site, i.e., the effects of a particular light level may depend on the availability of other resources, in this case water. The probability,  $\mu$ , that a particular percent cover category,  $g$ , is recorded is estimated as:

$$\text{logit}(\mu_{i,g}) = (\lambda_0 + \lambda_{s(i)} \text{canopy closure}_i) su_i + \varepsilon_i$$

with fixed effect coefficients,  $\lambda$ , and random individual effects,  $\varepsilon$ . This way the effects of canopy closure, i.e., light, were estimated for each soil moisture category,  $s$  (Table A1).

All parameters specified in the model were estimated from distributions with non-informative parameter values, or priors:

-fixed effects coefficients

$$\alpha_*, \beta_*, \lambda_* \sim \text{Normal}(0, 10000)$$

-random effects

$$\varepsilon_i \sim \text{Normal}(0, \sigma_\varepsilon^2)$$

$$\omega_i | \omega_{j, j \neq i} \sim \text{Normal}\left(\sum_j b_{ij} \omega_j, \sigma_\omega^2\right)$$

$b_{ij}$  is an indicator function, = 1 if locations  $i$  and  $j$  are within a 10 km radius of each other, and = 0 otherwise (Ibáñez et al. 2009a).

-variances

$$1/\sigma_{\omega}^2 \sim \text{Gamma}(0.5, 0.0005)$$

$$1/\sigma_{\varepsilon}^2 \sim \text{Gamma}(0.01, 0.01)$$

$$\sigma_{\beta^*} \sim \text{Uniform}(0, 1000)$$

Models were run in OpenBUGS 1.4 (Thomas et al. 2006). Three chains were run to ensure convergence of the parameter estimates (100,000 iterations), and parameter estimate values were calculated after discarding the burn-in period (~25,000 iterations).

### **Step 3: Assessment of biological invasions**

We evaluated the different models we tried (Table A2) by their performance predicting the data, but we did not validate them with independent data, as these are rare (and never available for potential invaded areas or future climates). We also analyzed the data by implementing a climate envelope colonization model that estimated the presence/absence data as a function of climate alone, and then comparing the climate envelope model estimates with our suitability estimates from the integrated assessment (Fig. A1). Parameter estimates are listed in Table A3.

We generated forecasts under different habitats and under two climate scenarios for the end of the century, from two climate models: CCSM3 and UKMO-HadCM3 (Fig. A2). Of the models participating in the IPCC AR4, these produced the two most disparate climate projections (most moderate and most extreme respectively (Wang 2005). We used the B1 scenario, which maintains current levels of carbon dioxide emissions.

**TABLE A1.** List of empirical and observational studies of *Celastrus orbiculatus* invasions in North America, and list of data sources used in the analysis. (\*) Indicates information/data included in the final model.

| Category                                          | Information                                                            | Source                                               |
|---------------------------------------------------|------------------------------------------------------------------------|------------------------------------------------------|
| <b><i>Species context-Demographic process</i></b> |                                                                        |                                                      |
| Reproduction                                      | Pollen viability 67%                                                   | Dreyer et al.1987                                    |
|                                                   | Mean seed rain 168 seeds/m <sup>2</sup>                                | Ellsworth et al. 2004 <i>b</i>                       |
|                                                   | *Seed germination 59-82%                                               | Dreyer et al.1987                                    |
|                                                   | Seed viability 60%                                                     | Ellsworth et al. 2004 <i>b</i>                       |
|                                                   | No seed bank                                                           | Ellsworth et al. 2004 <i>b</i>                       |
| Dispersal                                         | By birds, mammals, humans                                              | Dreyer et al.1987                                    |
|                                                   | Long distance by birds                                                 | Dreyer et al.1987                                    |
|                                                   | Fruit traits that promote bird dispersal                               | Gosper et al. 2005                                   |
|                                                   | Removal rate 76 % Dispersal rate 75%                                   | Greenberg et al. 2001                                |
|                                                   | Root suckering                                                         | Dreyer et al.1987                                    |
| Establishment                                     | *Seedling emergence ~100%                                              | Ellsworth et al. 2004 <i>b</i>                       |
|                                                   | *Intact litter reduces emergence 20%                                   | Ellsworth et al. 2004 <i>b</i>                       |
|                                                   | *Thick litter reduces establishment, most abundant in evergreen stands | Facelli and Pickett 1991                             |
| Survival                                          | Can establish at low light                                             | Ellsworth et al. 2004 <i>a</i>                       |
|                                                   | *First winter survival lower in open sites                             | Ellsworth et al. 2004 <i>a</i>                       |
|                                                   | *Second year survival 25% lower at low light                           | Ellsworth et al. 2004 <i>a</i>                       |
| Growth                                            | Plastic growth responses                                               | Clement et al. 1991                                  |
|                                                   | *Greater growth in high light                                          | Ellsworth et al. 2004 <i>a</i>                       |
|                                                   | At low light higher growth rates than native <i>Celastrus</i>          | Leicht-Young et al. 2007<br>Leicht and Silander 2006 |
|                                                   | Similar population dynamics than the native community                  | Meiners 2007                                         |
|                                                   | Longer growing season than native competitor <i>Vitis riparia</i>      | Tibbetts & Ewers 2000                                |
| <b><i>Habitat context-Susceptibility</i></b>      |                                                                        |                                                      |

|                                    |                                                                                                               |                                                                                                                             |
|------------------------------------|---------------------------------------------------------------------------------------------------------------|-----------------------------------------------------------------------------------------------------------------------------|
| Habitat preferences                | *Associated with low soil drainage and mesic environments                                                     | Kelly et al. 2009<br>McNab & Loftis 2002                                                                                    |
|                                    | *Mainly found at forest edge habitats, scarce in forest interior                                              | Ibáñez et al. 2009<br>Kuhman et al. 2010                                                                                    |
|                                    | Less abundant in areas with disturbed forest floor, and wind-disturbed areas                                  | McNab & Loftis 2002                                                                                                         |
|                                    | Associated with low <i>Quercus</i> abundance (drier, thick litter layer)                                      | Kelly et al. 2009                                                                                                           |
| Landscape configuration            | *Associated with urban/developed areas                                                                        | Ibáñez et al. 2009<br>Albright et al. 2009<br>Kuhman et al. 2010<br>McNab & Loftis 2002<br>Pande 2007<br>Kuhman et al. 2010 |
|                                    | *Associated with mesic conditions                                                                             | Ibáñez et al. 2009a                                                                                                         |
| Climate                            | *Associated with lower summer temperature                                                                     | Ibáñez et al. 2009a                                                                                                         |
|                                    | *Associated with higher winter temperature                                                                    | Ibáñez et al. 2009a                                                                                                         |
|                                    | *Associated with higher precipitation                                                                         | Ibáñez et al. 2009a                                                                                                         |
|                                    | *Associated with higher summer precipitation                                                                  | Ibáñez et al. 2009a                                                                                                         |
| <b>System context</b>              |                                                                                                               |                                                                                                                             |
| Legacies                           | *Past disturbances associated with current presences and higher cover                                         | Kuhman et al. 2010                                                                                                          |
|                                    | Past land history associated with presence                                                                    | Lundgren et al. 2004                                                                                                        |
| Windows of opportunity             | Synergistic expansion in the Southern Appalachians as hemlock wooly adelgid is creating newly suitable areas  | Albright et al. 2009                                                                                                        |
|                                    | *Higher abundance and likelihood of presence in abandoned sites                                               | Ibáñez et al. 2009a,b                                                                                                       |
|                                    | Higher presence in disturbed sites                                                                            | Mosher et al. 2009                                                                                                          |
|                                    | Invasion triggered by logging disturbances                                                                    | Silveri et al. 2001                                                                                                         |
| <b>Data sources</b>                |                                                                                                               |                                                                                                                             |
| Presence/absence and percent cover | *4200 geo-referenced plots were surveyed in New England; plot data on habitat type, soil moisture, and canopy | IPANE-Mehrhoff et al. 2003                                                                                                  |

---

|                            |                                                                                                                                                                    |                                        |
|----------------------------|--------------------------------------------------------------------------------------------------------------------------------------------------------------------|----------------------------------------|
|                            | closedness were also collected                                                                                                                                     |                                        |
|                            | *Percent cover levels (%): <1, 1-5, 6-25, 26-50, 51-75, and 76-100                                                                                                 | Ibáñez et al. 2009 <i>b</i>            |
|                            | *Habitats considered: edge, deciduous and mixed forests, evergreen forests, open wetlands, closed canopy wetlands, marine influence, and abandoned                 | Ibáñez et al. 2009 <i>a,b</i>          |
|                            | *Soil moisture levels: xeric, mesic, saturated, and inundated                                                                                                      | IPANE-Mehrhoff et al. 2003             |
|                            | *Canopy closure levels (%): 0-25, 26-50, 51-75, and 76-100                                                                                                         | Ibáñez et al. 2009 <i>a,b</i>          |
| Climate                    | *Long-term averages at a ~1km resolution associated with each surveyed plot                                                                                        | WorldClim-Hijmans et al. 2005          |
|                            | *Variables considered: mean summer maximum temperature, mean winter minimum temperature, annual precipitation, summer precipitation, and precipitation seasonality | Ibáñez et al. 2009 <i>a</i>            |
| Land Use Land Cover (LULC) | *Percent of each land use category in a 10 km radius around each surveyed plot from 30x30 m resolution satellite data                                              | 2001 New England LULC data (NOAA 2007) |
|                            | *Categories used: developed, deciduous and mixed forests, evergreen forests, crops, scrub/shrubland, and pastures/grasslands                                       | Ibáñez et al. 2009 <i>a</i>            |

---

**TABLE A2.** List of selected models run to estimate *Celastrus* invasion potential, and associated Deviance Information Criterion (DIC). Models show an increase in complexity and amount of information included with decreasing DIC. The first model is representative of a niche model that includes only climate and presence/absence data. The final model selected was the one that better explained the presence/absence and cover data, and had the lowest DIC (bold). This model included most of the demographic data available and accounted for all phases of the invasion process.

|    | Model                                                                                                                                                                                                                                                                              | DIC         |
|----|------------------------------------------------------------------------------------------------------------------------------------------------------------------------------------------------------------------------------------------------------------------------------------|-------------|
| 1. | Climate only informing site suitability                                                                                                                                                                                                                                            | 3912        |
| 2. | Climate informing site suitability, LULC data informing propagule availability, and germination and establishment rates included                                                                                                                                                   | 3885        |
| 3. | Climate informing site suitability through habitat type, LULC data informing propagule availability, and germination and establishment rates included                                                                                                                              | 3819        |
| 4. | Climate informing site suitability through habitat type, LULC data informing propagule availability and spatial random effects included, and germination and establishment rates included                                                                                          | 3811        |
| 5. | Climate informing site suitability through habitat type, LULC data informing propagule availability and spatial random effects included, and germination and establishment rates included. Percent cover data estimated as a function of site suitability, soil moisture and light | <b>3773</b> |

**TABLE A3.** Parameter estimates from the best *Celastrus* model (posterior mean values (SD)).

Bold values indicate fixed effect coefficients that are statistically significant (i.e., 95% CI, below, does not include zero).

| Parameter                              | Mean(SD)<br>95%CI                        | Parameter                              | Mean(SD)<br>95%CI                        | Parameter                             | Mean(SD)<br>95%CI           |
|----------------------------------------|------------------------------------------|----------------------------------------|------------------------------------------|---------------------------------------|-----------------------------|
| $\alpha_0$ intercept                   | -0.04(0.26)<br>-0.53,0.5                 | $\beta_{3,5}$ closed-canopy<br>wetland | -1.38(1.05)<br>-3.16,0.41                | $\sigma_{\epsilon}^2$                 | 733(64)<br>879.5,619.9      |
| $\alpha_1$ land developed              | <b>2.22 (0.92)</b><br><b>0.97,4.45</b>   | $\beta_{3,6}$ marine                   | -0.67(1.74)<br>-4.26,2.5                 | $\sigma_{\omega}^2$                   | 0.006(0.002)<br>0.012,0.004 |
| $\beta_0$ intercept                    | <b>-0.42(0.07)</b><br><b>-0.57,-0.28</b> | $\beta_{3,7}$ abandoned                | <b>1.76(0.79)</b><br><b>0.27,3.35</b>    | $\sigma_{\beta_1}^2$ summer temp      | 0.33(0.16)<br>0.17,0.5      |
| $\beta_1$ summer temp                  | -0.06(0.56)<br>-1.19,1.08                | $\beta_4$ prec seasonality             | <b>-0.97(0.46)</b><br><b>-1.9,-0.03</b>  | $\sigma_{\beta_1}^2$ winter temp      | 0.33(0.11)<br>0.21,0.45     |
| $\beta_{1,1}$ edge                     | <b>0.73(0.31)</b><br><b>0.12,1.32</b>    | $\beta_{4,1}$ edge                     | <b>-1.04(0.41)</b><br><b>-1.86,-0.24</b> | $\sigma_{\beta_1}^2$ annual prec      | 0.67(0.41)<br>0.25,1.08     |
| $\beta_{1,2}$ dec-mix forest           | <b>-0.78(0.41)</b><br><b>-1.6,-0.03</b>  | $\beta_{4,2}$ dec-mix forest           | <b>-1.46(0.5)</b><br><b>-2.57,-0.6</b>   | $\sigma_{\beta_1}^2$ prec seasonality | 0.39(0.18)<br>0.2,0.58      |
| $\beta_{1,3}$ ever forest              | -0.85(0.58)<br>-2.08,0.13                | $\beta_{4,3}$ ever forest              | -0.83(0.49)<br>-1.72,0.15                | $\sigma_{\beta_1}^2$ summer prec      | 0.3(0.21)<br>0.08,0.52      |
| $\beta_{1,4}$ open wetland             | <b>-1.24(0.6)</b><br><b>-2.49,-0.21</b>  | $\beta_{4,4}$ open wetland             | <b>-1.5(0.55)</b><br><b>-2.71,-0.58</b>  |                                       |                             |
| $\beta_{1,5}$ closed-canopy<br>wetland | 0.20(0.66)<br>-0.99,1.54                 | $\beta_{4,5}$ closed-canopy<br>wetland | -0.91(0.71)<br>-2.32,0.55                |                                       |                             |
| $\beta_{1,6}$ marine                   | 1.45(0.87)<br>-0.04,3.27                 | $\beta_{4,6}$ marine                   | -1.37(0.79)<br>-1.49,1.53                |                                       |                             |
| $\beta_{1,7}$ abandoned                | 0.27(0.56)<br>-0.87,1.38                 | $\beta_{4,7}$ abandoned                | -0.13(0.79)<br>-1.49,1.53                |                                       |                             |
| $\beta_2$ winter temp                  | <b>2.35(0.44)</b><br><b>1.53,3.29</b>    | $\beta_5$ summer prec                  | 0.39(0.47)<br>-0.48,1.45                 |                                       |                             |
| $\beta_{2,1}$ edge                     | <b>1.8(0.33)</b><br><b>1.17,2.44</b>     | $\beta_{5,1}$ edge                     | -0.27(0.34)<br>-0.97,0.35                |                                       |                             |
| $\beta_{2,2}$ dec-mix forest           | <b>2.85(0.53)</b><br><b>1.93,3.91</b>    | $\beta_{5,2}$ dec-mix forest           | 0.05(0.37)<br>-0.97,0.35                 |                                       |                             |
| $\beta_{2,3}$ ever forest              | <b>3.1(0.65)</b><br><b>2.4,4.3</b>       | $\beta_{5,3}$ ever forest              | 0.18(0.38)<br>-0.52,0.91                 |                                       |                             |
| $\beta_{2,4}$ open wetland             | <b>2.2(0.59)</b><br><b>1.03,3.41</b>     | $\beta_{5,4}$ open wetland             | <b>0.96(0.48)</b><br><b>0.09,1.89</b>    |                                       |                             |
| $\beta_{2,5}$ closed-canopy<br>wetland | <b>2.56(0.71)</b><br><b>1.35,3.98</b>    | $\beta_{5,5}$ closed-canopy<br>wetland | 1.37(0.85)<br>-0.02,3.16                 |                                       |                             |
| $\beta_{2,5}$ marine                   | <b>2.1(0.67)</b><br><b>0.87,3.36</b>     | $\beta_{5,6}$ marine                   | 1.09(0.91)<br>-0.39,3.18                 |                                       |                             |
| $\beta_{2,7}$ abandoned                | <b>1.63(0.52)</b><br><b>0.64,2.64</b>    | $\beta_{5,7}$ abandoned                | -0.55(0.56)<br>-1.75,0.41                |                                       |                             |
| $\beta_3$ annual prec                  | -0.46(0.81)<br>-2.17,1.02                | $\lambda_0$ intercept                  | <b>43.5(3.39)</b><br><b>38.5,49.3</b>    |                                       |                             |
| $\beta_{3,1}$ edge                     | <b>0.83(0.43)</b><br><b>0.05,1.67</b>    | $\lambda_1$ xeric                      | <b>-0.26(0.19)</b><br><b>-0.68,0.1</b>   |                                       |                             |
| $\beta_{3,2}$ dec-mix forest           | -0.96(0.56)<br>-2.01,0.11                | $\lambda_2$ mesic                      | <b>-0.33(0.07)</b><br><b>-0.46,-0.2</b>  |                                       |                             |

---

|                            |                                          |                       |                                         |
|----------------------------|------------------------------------------|-----------------------|-----------------------------------------|
| $\beta_{3,3}$ ever forest  | -1.19(0.65)<br>-2.42,0.02                | $\lambda_3$ saturated | <b>-0.77(0.2)</b><br><b>-1.19,-0.37</b> |
| $\beta_{3,4}$ open wetland | <b>-1.29(0.64)</b><br><b>-2.59,-0.01</b> | $\lambda_4$ inundated | <b>-4.89(2.96)</b><br><b>-10.4,-0.2</b> |

---

## Difference

### Climate envelope - Integrated

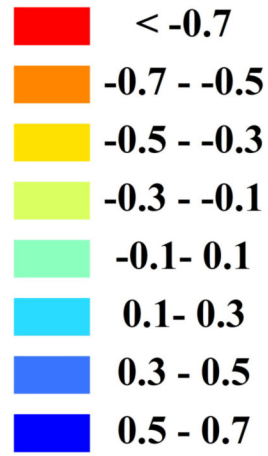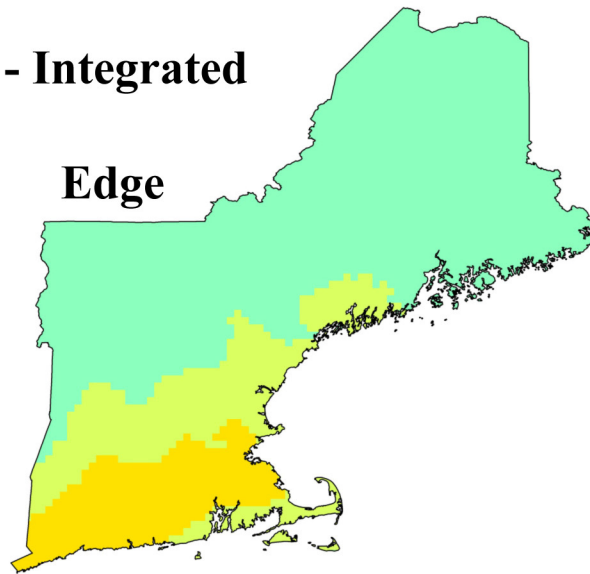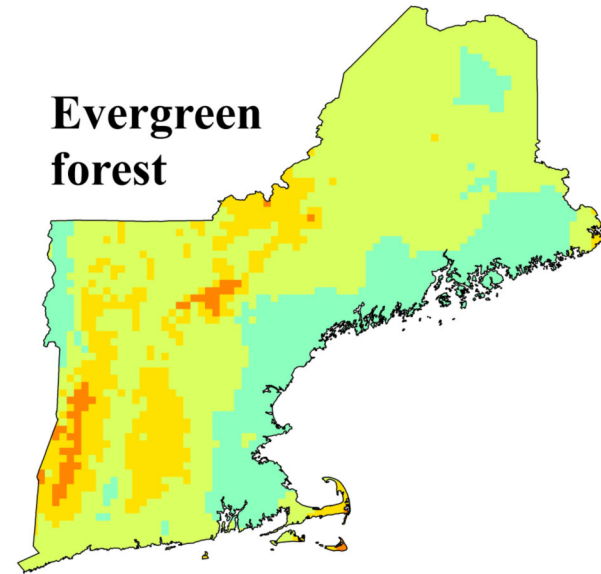

**FIG. A1.** Differences between climate envelope (DIC 3912) and integrated (DIC 3773) model predictions of the likelihood of colonization for edge and evergreen forest habitats. For edge habitats, which are more suitable for *Celastrus*, the integrated model predicts greater colonization potential than the null model, but only in the southern areas of the region, for evergreen forest, the integrated model predicts greater colonization potential than the null model for most of the region, in both cases better fitting the data.

## Effect of habitat on Colonization

## Effect of climate change on Colonization

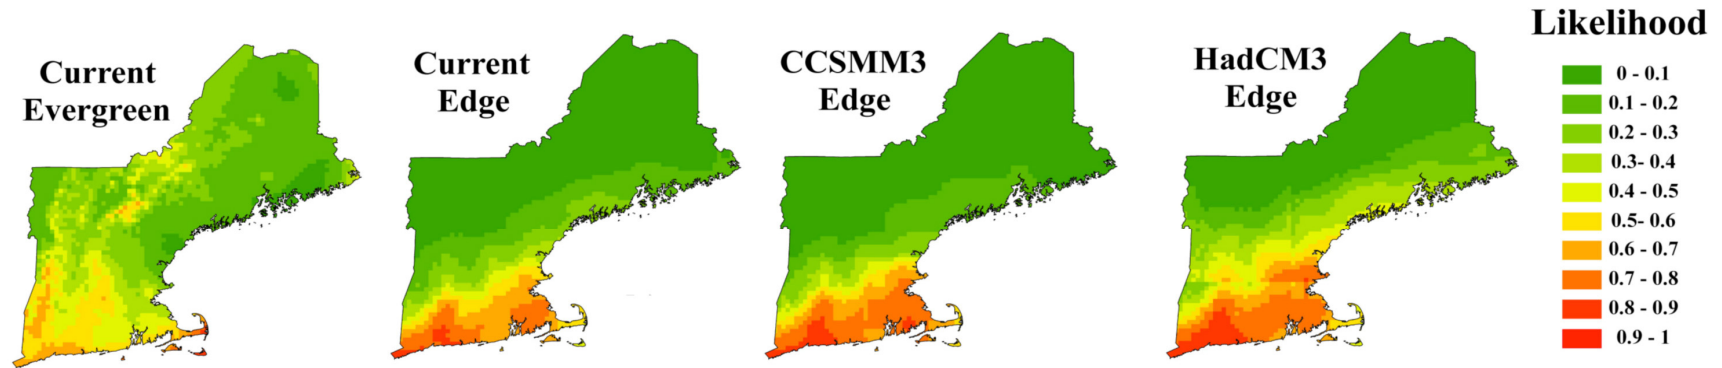

**FIG. A2.** Left panels: likelihood of colonization under current climate and landscape configuration at two different habitats showing how the combination of climate and habitat is not additive, and strongly modulates the suitability of a site. Right panels: likelihood of colonization under two future climate scenarios, only under the most extreme climate predictions, HadCM3 model, we predict substantial changes with respect to current conditions.

## **CASE STUDY 2: *Mytilus galloprovincialis***

### **Steps 1: Data synthesis - Linking the invasion process to population demography**

We gathered information on species and habitat context from 62 observational and experimental studies of *M. galloprovincialis*, which provided data on reproduction, dispersal, recruitment, juvenile and adult survival, and larval, juvenile, and adult growth rates (Table A4). The two response variables we included in the analysis were adult survival and adult growth rates, as proxies for potential to colonize and proliferate, respectively. We used the geo-referenced points associated with each of the studies to pair data on sea surface temperature and chlorophyll *a* content (Feldman and McClain 2012) with demographic records.

### **Step 2: Data-model model integration using hierarchical models**

To estimate the suitability of a site as a function of environmental variables and growth as a function of resources, we used tidal zones, maximum sea surface temperatures, and maximum chlorophyll levels as the explanatory variables in our model. In this case, given the small number of predictive variables and of observations available (~20 for each sub-model), we considered a smaller number of models (Table A5). Other models run with variations of these predictors, e.g., average or minimum temperature, did not generate substantially different results.

Observational studies have recorded mean dispersal distances of ~30 km (Becker et al. 2007, Carson et al. 2010), and maximum dispersal of ~60–100 km (Gilg and Hilbish 2003, Branch and Steffani 2004). We used that information to fit an exponential decay function ( $\rho e^{-\rho x}$ ) that estimated the probability of colonization as a function of dispersal from larval sources, with a mean ( $1/\rho$ ) of ~30 km. Thus, *dispersal* probability was estimated a priori (before running the model) and varied from 1, next to the larval source, to almost 0 at 100 km, which would still

allow for rare long-distance dispersal events and reflect the patterns of dispersal that have been reported.

We then used the survival and growth data to estimate the relative performance of this species under varying environmental conditions and across habitats. As data available came from studies that were run for different periods of time, we standardized the data by calculating daily survival rates, ‘*Survival*’ ( $N = 24$  observations). Then for each observation  $i$ :

$Survival_i \sim Normal(Sur_i, \sigma_i^2)$  limited between 0–1 (we also tried using a *Beta* distribution but a *Normal* with limits 0–1 worked better)

$$logit(Sur_i) = \gamma_{z(i)} + \gamma_5 * temperature\_max_i$$

A different slope,  $\gamma_{1-4}$ , was estimated for each of the four tidal zones  $z$  (sub-tidal and low-, mid- and high-shore), to reflect differences in suitability among the zones because of factors not accounted for (e.g., predation). Parameters  $\gamma$  were estimated from non-informative prior distributions,  $\gamma \sim Normal(0, 10000)$ . We used reported values (standard errors and standard deviations around survival) to estimate the variance associated to each observation,  $\sigma_i^2$ .

Growth rate (*Growth*; mm/day), our proxy for *proliferation* (as growth is related to competitive ability), was also modeled as a function of environmental covariates ( $N = 20$  observations):

$Growth_i \sim Normal(Gr_i, \sigma_i^2)$  limited to  $> 0$  (we also tried using a *logNormal* distribution, but a *Normal* captured the different growth trends across habitats better)

$$Gr_i = \alpha_1 + \alpha_2 * Chlorophyll\_max_i + \beta_{z(i)} * temperature\_max_i$$

Parameters were then estimated from non-informative prior distributions,  $\alpha_* \sim \text{Normal}(0, 10000)$ .

To take into account the effect of temperature on growth rates at each of the tidal zones ( $z$ ), we followed a hierarchical approach:

$$\beta_z \sim \text{Normal}(\beta_m, \sigma_\beta^2)$$

$$\beta_m \sim \text{Normal}(0, 10000) \text{ and } \sigma_\beta \sim \text{Uniform}(0, 1000)$$

And as we did in the survival submodel, we used reported values (standard errors and standard deviations around growth rates measurements) to estimate the variance associated with each observation,  $\sigma_i^2$ .

The model was run in OpenBUGS 1.4 (Thomas et al. 2006). Three chains were run to ensure convergence of the parameter estimates (50,000 iterations), and parameter estimates values were calculated after discarding the burn-in period (~10,000 iterations).

### **Step 3: Assessment of biological invasions**

In this case study, we were again not able to validate our final model outcome with independent data, although the best model was selected based on the models' performance predicting the data (Table A5). From the parameters' estimates (means, variances and covariances; Table A6), we assessed the potential for invasion under several maximum chlorophyll  $a$  levels (low: 2, mid: 50, high: 100 mg m<sup>-3</sup>) and as a function of distance to source (0 to 50 km) and of maximum water temperature (15 to 25 °C, see Fig. 5 in main text).

To represent the outcomes we standardized our estimates of daily rates of growth, *proliferation*, to range between 0 and 1, with zero representing lowest rates recorded and thus lowest potential for proliferation. We also estimated the complex pattern of uncertainty associated with our

predictions (Fig. A3), which in general illustrated that uncertainty was much lower for the sub-tidal zone than for the intertidal habitats, making predictions for the sub-tidal habitat most reliable.

We also compared our estimates of colonization with those from a climate envelope colonization model where only survival data were analyzed as a function of water temperatures and without differentiating among the four intertidal habitats,  $\text{logit}(\text{Sur}_i) = \gamma_1 + \gamma_2 * \text{temperature\_max}_i$  (Fig. A4).

**TABLE A4.** Empirical and observational studies of *Mytilus galloprovincialis* invasions from around the world. (\*) Indicates information/data included in the final model.

| Category                                   | Information                                                                                                                                                                                                                                                                              | Source                                                                                                        |
|--------------------------------------------|------------------------------------------------------------------------------------------------------------------------------------------------------------------------------------------------------------------------------------------------------------------------------------------|---------------------------------------------------------------------------------------------------------------|
| <i>Species context-Demographic process</i> |                                                                                                                                                                                                                                                                                          |                                                                                                               |
| Reproduction                               | Spawning season<br>– spring/summer<br>- Spring/Summer, second spawn in Nov.<br>- Spring/Summer<br>- Late Summer<br>Larval survival rates (caged larvae in field) 0.34± 0.47% survival                                                                                                    | Bownes and McQuaid 2009<br>Doherty et al. 2009<br>Gilg et al. 2007<br>Petes et al. 2007<br>Becker et al. 2007 |
| Recruitment rate                           | South Africa: sheltered shore ranged from 2.7 to 8.25 individuals m <sup>-2</sup> yr <sup>-1</sup><br>Semi-exposed shore ranged from 10.9 to 111.81 individuals m <sup>-2</sup> yr <sup>-1</sup><br>Exposed shore ranged from 52.7 to 206.7 individuals m <sup>-2</sup> yr <sup>-1</sup> | Branch et al. 2008<br>Branch et al 2008<br>Branch et al 2008                                                  |
| Larval Growth Rate                         | Larval growth rate ranges from 5 to 8.6µm day <sup>-1</sup> depending on food availability<br>Size at settlement ranges from 240-282µm depending on food                                                                                                                                 | Phillips 2002<br>Phillips 2002                                                                                |
| Survival rate (post-settlement juvenile)   | South Africa: survival through 6 days on low shore 87.8± 15.57%, survival through 6 days on mid shore was 52.35± 29.04%, high shore was 83.02± 33.1%                                                                                                                                     | Bownes and McQuaid 2009                                                                                       |
| Growth rate (post settlement)              | North America: growth rate ranged from 2 to 35 µm day <sup>-1</sup><br>South Africa: 3.5 to 143µm day <sup>-1</sup>                                                                                                                                                                      | Phillips 2002<br>Bownes and McQuaid 2009                                                                      |
| Survival rate (adult)                      | *South Africa: low shore survival ranges from 20.6 to 56.8% up to 112 days, mid shore survival ranges from 41.8 to 66% up to 112 days, high shore survival ranges from 41.01 to 59.2%                                                                                                    | Bownes and McQuaid 2010                                                                                       |

|                     |                                                                                                                                                                                                                                                                                                                                                                                                                                                                                                                                                                                                                                                                                                                                                                                                                                                                                                                                                                                                                                                                                                                                                                                                                                                        |                                                                                                                                                                                                                    |
|---------------------|--------------------------------------------------------------------------------------------------------------------------------------------------------------------------------------------------------------------------------------------------------------------------------------------------------------------------------------------------------------------------------------------------------------------------------------------------------------------------------------------------------------------------------------------------------------------------------------------------------------------------------------------------------------------------------------------------------------------------------------------------------------------------------------------------------------------------------------------------------------------------------------------------------------------------------------------------------------------------------------------------------------------------------------------------------------------------------------------------------------------------------------------------------------------------------------------------------------------------------------------------------|--------------------------------------------------------------------------------------------------------------------------------------------------------------------------------------------------------------------|
|                     | <p>*New Zealand: daily mortality rate (over 134 days) estimated as <math>-0.4 \pm 0.097\% \text{ day}^{-1}</math> and <math>-0.38 \pm 0.074\% \text{ day}^{-1}</math> (1SE)</p> <p>*New Zealand: surviving proportion after 117-128 days: <math>42.9 \pm 13.1\%</math> and <math>63.6 \pm 4\%</math> (1SE).</p> <p>*South Africa: average monthly survival rate ranged from 85.7 to 98.34% at bay site, ranged from 84.7 to 95.9% at wave-exposed site</p> <p>*South Africa: cumulative survival after 1 year ranged from <math>68.6 \pm 10\%</math> to <math>73 \pm 6.6\%</math> in high zone, cumulative survival in mid zone ranged from <math>63.8 \pm 14.6\%</math> to <math>67.3 \pm 14.6\%</math> in mid zone</p> <p>*Lab study: cumulative survival after 9 weeks in water or air/water ranged from 50.2% to 98.2%</p> <p>*Canada: survival after 3 months: 75% and 100% in subtidal</p> <p>*USA: survival after 3 months: <math>90.4 \pm 6.6\%</math> to <math>97.2 \pm 0.64\%</math></p> <p>*South Africa: monthly survival rate tracked over 6 months, ranged from <math>51.1 \pm 36.6\%</math> to <math>95.4 \pm 5.2\%</math></p> <p>*South Africa: survival rate after 7 months was 38.08% high shore, 5.9% mid shore, 0.7% low shore</p> | <p>Menge et al. 2007</p> <p>Menge et al. 2007</p> <p>Nicastro et al 2010a</p> <p>Rius and McQuaid 2009</p> <p>Schneider 2008</p> <p>Shields et al. 2008</p> <p>Shinen and Morgan 2009</p> <p>Zardi et al. 2008</p> |
| Growth rate (adult) | <p>*South Africa: <math>0.0467 \pm 0.036 \text{ mm day}^{-1}</math> in summer</p> <p>*South Africa: <math>0.057 \pm 0.033 \text{ mm day}^{-1}</math></p> <p>*France: <math>0.0538 \text{ mm day}^{-1}</math></p> <p>*New Zealand: <math>0.001 \pm 0.0017 \text{ mm day}^{-1}</math> at Boulder Bay, <math>0.0424 \pm 0.0465 \text{ mm day}^{-1}</math> at Box Thumb</p> <p>*New Zealand: high zone range 0 to <math>0.010 \text{ mm day}^{-1}</math>, low zone range <math>0.014</math> to <math>0.050 \text{ mm day}^{-1}</math></p> <p>*USA: <math>0.008</math> to <math>0.044 \text{ mm day}^{-1}</math> depending on water + air</p>                                                                                                                                                                                                                                                                                                                                                                                                                                                                                                                                                                                                               | <p>Zardi et al. 2006</p> <p>Bownes and McQuaid 2010</p> <p>Bownes and McQuaid 2010</p> <p>Kopp et al. 2005</p> <p>Menge et al. 2007</p> <p>Petes et al. 2007</p> <p>Schneider 2008</p>                             |

---

|                                              |                                                                                                                                                                                                                                                                                               |                                                                                      |
|----------------------------------------------|-----------------------------------------------------------------------------------------------------------------------------------------------------------------------------------------------------------------------------------------------------------------------------------------------|--------------------------------------------------------------------------------------|
|                                              | temperatures (more data available)                                                                                                                                                                                                                                                            |                                                                                      |
|                                              | *USA: field growth rates range from 0.0125 to 0.019 mm day <sup>-1</sup>                                                                                                                                                                                                                      |                                                                                      |
|                                              | *South Africa: growth rate at upwelling sites ranged from 0.0047 to 0.044 mm day <sup>-1</sup>                                                                                                                                                                                                | Shinen and Morgan 2009<br>Xavier et al 2007                                          |
|                                              | *South Africa: growth rate at non-upwelling sites ranged from 0.0005 to 0.043 mm day <sup>-1</sup>                                                                                                                                                                                            | Xavier et al 2007                                                                    |
|                                              | *Italy: Scope for growth (J hr <sup>-1</sup> available for growth + repro) at 14.67± 10.7 at 5m depth, 12.9± 12.43 J hr <sup>-1</sup> at 15m depth                                                                                                                                            | Sara and Pusceddu 2008                                                               |
| <b><i>Habitat context-Susceptibility</i></b> |                                                                                                                                                                                                                                                                                               |                                                                                      |
| Water Temperature                            | *Lab: mussels acclimated at 14°C experienced heart failure at 26.5, 28.3, 25.7°C water temp for 22,28,34ppt acclimation salinities, respectively. Mussels acclimated at 21°C experienced heart failure at 29.8, 30.6, 30.8°C water temp for 22,28,34ppt acclimation salinities, respectively. | Braby and Somero 2006a                                                               |
| Salinity                                     | Lab: acclimation at 22ppt produced lower critical salinity value of 8.85ppt, higher acclimation salinities had higher critical values.                                                                                                                                                        | Braby and Somero 2006a                                                               |
| Desiccation                                  | *South Africa – survival after 4 days in air at 17°C + 60%RH was 96.8± 3.8% (1SD)                                                                                                                                                                                                             | Nicastro et al. 2010                                                                 |
| Anoxia                                       | Lab: mussels begin dying after ~8 days in anoxic water at 20°. Switch to anaerobic metabolism occurs below oxygen concentrations of ~3ppm                                                                                                                                                     | De Zwaan et al 1991                                                                  |
| Wave exposure                                | *Survival is generally poor at wave-exposed sites<br><br>*On wave-exposed shores, survival is greater at higher shore heights                                                                                                                                                                 | Nicastro et al. 2010b, Rius and McQuaid 2006, Zardi et al. 2008<br>Zardi et al. 2006 |
| Temperature                                  | *Survival is better than native <i>M.</i>                                                                                                                                                                                                                                                     | Schneider and Helmuth 2007,                                                          |

---

|                              |                                                                                                                                                  |                            |
|------------------------------|--------------------------------------------------------------------------------------------------------------------------------------------------|----------------------------|
|                              | <i>trossulus</i> or <i>Perna</i> at sun-exposed (hot) sites.                                                                                     | Petes et al 2007           |
|                              | *Overall survival is lowest in sun-exposed high shore sites (in protected bays)                                                                  | Schneider and Helmuth 2007 |
|                              | *Growth and survival are highest in subtidal conditions (absent predators)                                                                       | Schneider 2008             |
| <b><i>System context</i></b> | -                                                                                                                                                |                            |
| Dispersal                    | *Disperse 20-30km before settlement                                                                                                              | Becker et al. 2007         |
|                              | *Mean dispersal distance 37( $\pm$ 27.6) km, 28-42% self-recruitment within a site                                                               | Carson et al. 2010         |
|                              | *90% of larvae settle within 12-20km of source. Average annual increase in range 42 km yr <sup>-1</sup> eastward, 19km yr <sup>-1</sup> westward | McQuaid and Phillips 2000  |
|                              | *Average northward spread of 115 km yr <sup>-1</sup>                                                                                             | Branch and Steffani 2004   |
|                              | *Mean dispersal distances 24.3 km eastward (35 km max), 30 km northward (64 km max)                                                              | Gilg and Hilbish 2003      |
|                              | -                                                                                                                                                |                            |

**TABLE A5.** Selected models run to estimate *Mytilus* potential for invasion. The final model best explained the survival and growth data, with the lowest DIC (bold).

| Model                                                                                                | DIC        |
|------------------------------------------------------------------------------------------------------|------------|
| 1. <i>Growth:</i> $\alpha + \beta_{z(i)} * temperature\_max_i$                                       | 320        |
| 2. <i>Growth:</i> $\alpha_1 + \alpha_2 * Chlorophyll\_average_i + \beta_{z(i)} * temperature\_max_i$ | 285        |
| 3. <i>Growth:</i> $\alpha_1 + \alpha_2 * Chlorophyll\_max_i + \beta_{z(i)} * temperature\_max_i$     | <b>251</b> |

**TABLE A6.** Parameter estimates for the best *Mytilus* model (mean posterior values (SD) and 95% credible intervals (below)). Bold values indicate statistically significant fixed effects.

| Parameter                       | Mean(SD)<br>95%CI                         | Parameter                   | Mean(SD)<br>95%CI                              |
|---------------------------------|-------------------------------------------|-----------------------------|------------------------------------------------|
| $\gamma_1$ intercept subtidal   | 9.04(0.04)<br>8.9,9.13                    | $\alpha_1$ intercept        | -0.01(0.01)<br>-0.03,0.008                     |
| $\gamma_2$ intercept low-shore  | 3.11 (0.04)<br>3,3.2                      | $\alpha_2$ Chlorophyll max  | <b>0.0003(0.00008)</b><br><b>0.0002,0.0005</b> |
| $\gamma_3$ intercept mid-shore  | 2.919(0.007)<br>2.91,2.93                 | $\beta_m$ temperature max   | 0.001(0.04)<br>-0.0009,0.003                   |
| $\gamma_4$ intercept high-shore | 3.91(0.03)<br>3.84,3.98                   | $\beta_1$ subtidal          | <b>0.002(0.0006)</b><br><b>0.001,0.003</b>     |
| $\gamma_5$ temperature max      | <b>0.103(0.01)</b><br><b>0.102,0.0104</b> | $\beta_2$ low-shore         | <b>0.0015(0.0006)</b><br><b>0.0012,0.003</b>   |
|                                 |                                           | $\beta_3$ mid-shore         | 0.0007(0.0006)<br>-0.0004,0.002                |
|                                 |                                           | $\beta_4$ high-shore        | 0.0008(0.0006)<br>-0.0004,0.002                |
|                                 |                                           | $\sigma^2$ beta-temperature | 0.000001(0.000001)<br>0.0000002,0.00003        |

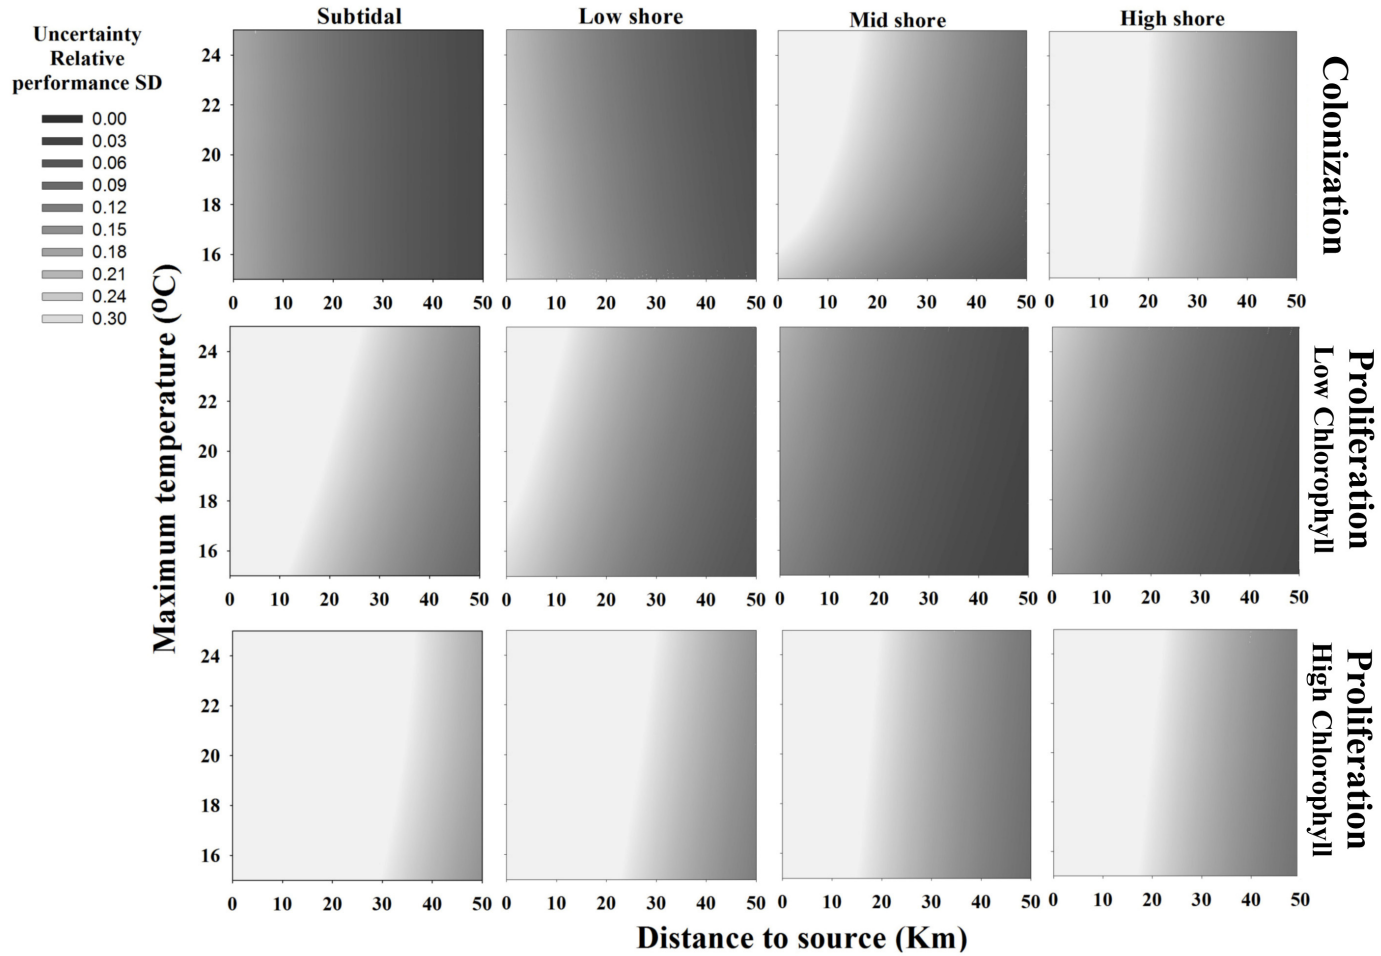

**FIG. A3.** Uncertainty estimates, shown as standard deviations around the mean posterior values for colonization (top panels) and proliferation (middle and bottom panels) associated with *M. galloprovincialis* invasions. Estimates are represented as a function of distance to larval sources and maximum sea surface temperature for each tidal zone, and of varying maximum chlorophyll *a* level (for spread estimates only).

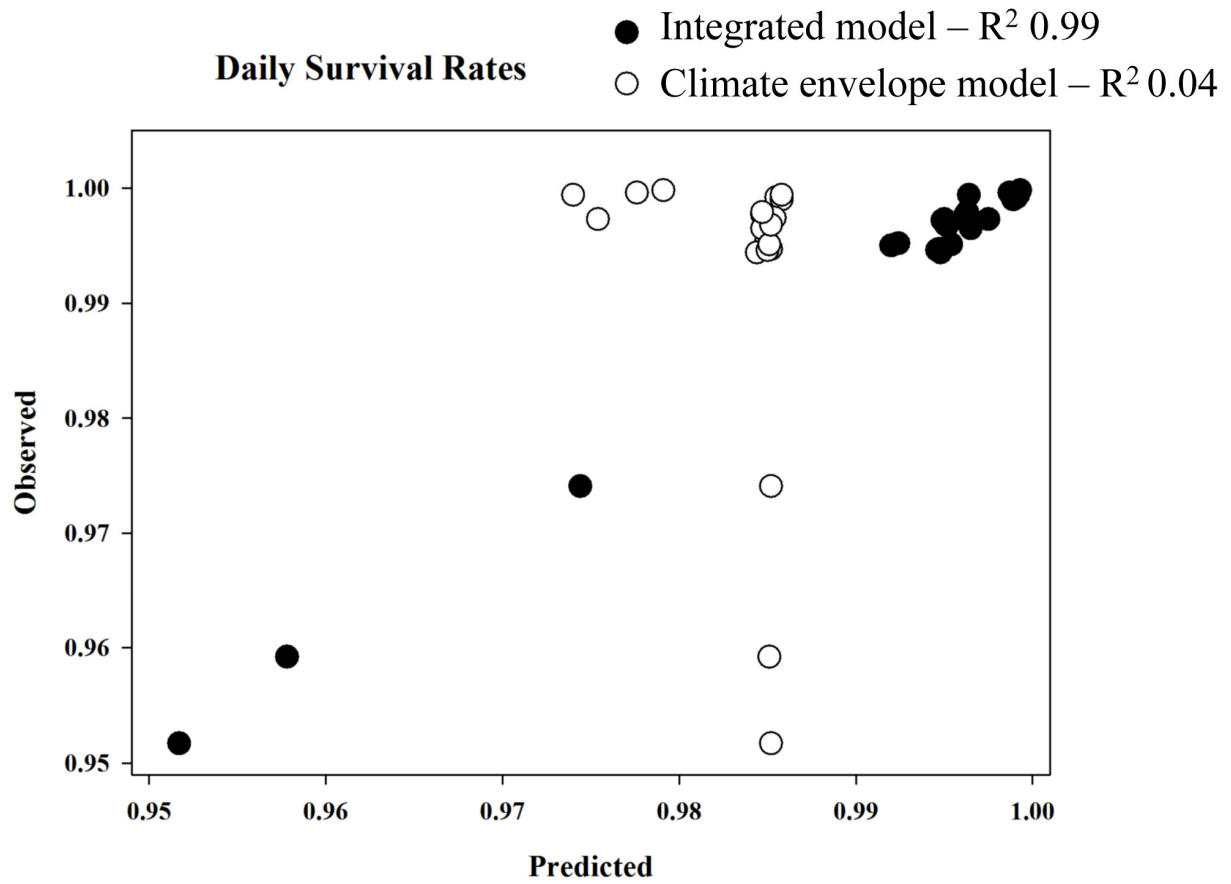

**FIG. A4.** Graphical representation of predicted vs. observed survival rates values for the climate envelope colonization model (open circles) and the integrated model (black circles).

### **CASE STUDY 3: *Orconectes rusticus***

#### **Steps 1: Data synthesis - Linking the invasion process to population demography**

To illustrate how we can work with varying levels of information, for this case study we used data from only one published study (Olden et al. 2011). This particular study does not include demographic data; the paper only provides presence/absence data for the invader and a measure of lake's vulnerability to the invasion based on presence/absence data for two native crayfish species before and after the introduction. This publication also reports the number of boat landings per lake, the type of water body (seepage or drainage), and a proxy for resource availability (Secchi disk depth – a measurement of water clarity). We identified winter minimum and summer maximum average air temperatures for each lake (PRISM Climate Group 2012). Temperature and resource availability data were standardized (ranging from -1 to 1) to facilitate comparisons of the parameter estimates. We tried several models and combinations of explanatory variables and report the best model fitting the data (Table A7).

#### **Step 2: Data-model model integration using hierarchical models**

Following Olden et al. (2011) we estimated probability of *dispersal* as a function of human visitation (boat landings) and included a spatial random effect. For each lake  $i$ :

$$\text{logit}(\text{Dispersal}_i) = \alpha_1 + \alpha_2 * \text{landings}_i + \omega_i$$

the fixed effect coefficients were estimated from non-informative prior distributions

$\alpha \sim \text{Normal}(0, 10000)$ . Here again, as we were using presence/absence data of a species that is still moving into an area, we added a spatial random effect,  $\omega_i$ , to reflect spatial autocorrelation

in the data and the fact that this species may not be in equilibrium with the environment (i.e., some absences may represent false absences):

$$\omega_i | \omega_{j,j \neq i} \sim \text{Normal}(-(\phi d_{ij})^\kappa, \sigma^2)$$

where  $d_{ij}$  is the distance between two locations,  $\phi$  is the rate of decay estimated from  $\phi \sim \text{Gamma}(0.1, 0.1)$ , the smoothing parameter,  $\kappa$ , was set up to 1, and  $1/\sigma^2 \sim \text{Gamma}(0.01, 0.01)$ .

Suitability of the site, our proxy for *colonization*, was calculated as:

$$\text{logit}(\text{Suitability}_i) = \beta_{wb(i)} + \beta_3 * \text{winter temperature\_min}_i + \beta_4 * \text{summer temperature\_max}_i$$

and fixed effect coefficients were estimated as  $\beta_* \sim \text{Normal}(0, 10000)$ , with a different intercept for each water body type,  $\beta_{wb}$ . We then estimated the likelihood of *O. rusticus* being present as:

$$\text{Presence}_i \sim \text{Bernoulli}(\text{Dispersal}_i * \text{Suitability}_i)$$

We finished the analysis by using the reported vulnerability assessment to estimate the potential for *proliferation* of *O. rusticus*. Vulnerability rankings (0–1) for each lake were used as an estimate of the competitive ability of this species to displace congeneric species, and were estimated as combination of the resources available (Secchi disk depth) and of the suitability of the site (estimated in the previous step).

$\text{Vulnerability}_i \sim \text{Normal}(\text{Vul}_i, \sigma^2)$  limited between 0–1 (we also tried using a *Beta* distribution but convergence of the parameters in a *Normal* with limits 0–1 was better)

$$\text{logit}(\text{Vul}_i) = (\gamma_1 + \gamma_2 * \text{Secchi\_disk\_depth}_i) * \text{Suitability}_i$$

Parameters were then estimated from non-informative prior distributions,

$1/\sigma^2 \sim \text{Gamma}(0.01, 0.01)$ ,  $\gamma_* \sim \text{Normal}(0, 10000)$ .

The model was run in OpenBUGS 1.4 (Thomas et al. 2006). Three chains were run to ensure convergence of the parameter estimates (50,000 iterations), and parameter estimate values were calculated after discarding the burn-in period (~25,000 iterations).

### Step 3: Assessment of biological invasions

Using the parameter estimates (means, variances and covariances; Table A8), we assessed the potential for invasion under several scenarios that account for an increase in human visitation, temperature and resources (Fig. 7 main text). We also report the uncertainty associated with each estimate (Fig. A5). The *dispersal* and *proliferation* phases had the greatest uncertainty. This high level of uncertainty suggests that, even if the estimated likelihood of invasion is low in a given location, the possibility of invasion should be accounted for when considering future management plans.

We also compared the integrated model's estimates of colonization with those of a climate envelope model that only estimated colonization as a function of the climatic variables:

$$Presence_i \sim Bernoulli(Suitability_i)$$

and

$$\logit(Suitability_i) = \beta_1 + \beta_2 * winter\_temperature\_min_i + \beta_4 * summer\_temperature\_max_i.$$

The climate envelope model had little predictive ability, with all means around 0.5 and standard deviations close to 0.5 (Fig. A6).

**TABLE A7.** Some of the models run to estimate invasion potential of *O. rusticus*. Models differ in the way that suitability and the availability of resources were combined to model lake vulnerability. The final model selected was the one that best explained the presence/absence data, with the lowest DIC (bold).

| Model                                                                                                                                   | DIC        |
|-----------------------------------------------------------------------------------------------------------------------------------------|------------|
| 1. Vulnerability: $\gamma_1 + \gamma_2 * Secchi\_disk\_depth$<br>No spatial random effects                                              | 401        |
| 2. Vulnerability: $\gamma_1 + \gamma_2 * Secchi\_disk\_depth + \gamma_2 * Suitability$<br>No spatial random effects                     | 375        |
| 3. Vulnerability: $(\gamma_1 + \gamma_2 * Secchi\_disk\_depth) * Suitability$<br>No spatial random effects                              | 337        |
| 4. Vulnerability: $(\gamma_1 + \gamma_2 * Secchi\_disk\_depth) * Suitability$<br>Included spatial random effects in <i>colonization</i> | <b>324</b> |

**TABLE A8.** Parameter estimates from the best *Orconectes* model (mean posterior values (SD) and 95% credible intervals). Bold values indicate fixed effect coefficients that are statistically significant (i.e., 95% CI does not include zero).

| Parameter                | Mean(SD)<br>95%CI                       | Parameter                    | Mean(SD)<br>95%CI                        |
|--------------------------|-----------------------------------------|------------------------------|------------------------------------------|
| $\alpha_1$ intercept     | -1.58 (0.28)<br>-2.11,-1.02             | $\beta_3$ winter temperature | 0.08 (0.1)<br>-0.07, 0.27                |
| $\alpha_2$ boat landings | <b>0.15 (0.08)</b><br><b>0.017,0.34</b> | $\beta_4$ summer temperature | <b>-1.95(0.35)</b><br><b>-2.67,-1.34</b> |
| $\phi$ rate of decline   | 0.00005(0.00003)<br>0.000008,0.0001     | $\gamma_1$ intercept         | -1.5(0.07)<br>-1.798,-1.4                |
| $\sigma^2_{spatial}$     | 0.68(0.19)<br>0.29,1.5                  | $\gamma_2$ Secchi disk depth | -0.11 (0.05)<br>-0.22,0.004              |
| $\beta_1$ drainage lake  | 3.87(1.01)<br>11.7,151.3                | $\sigma^2_{vulnerability}$   | 0.01(0.009)<br>0.008,0.012               |
| $\beta_2$ seepage lake   | 5.69(1.48)<br>2.81,8.34                 |                              |                                          |

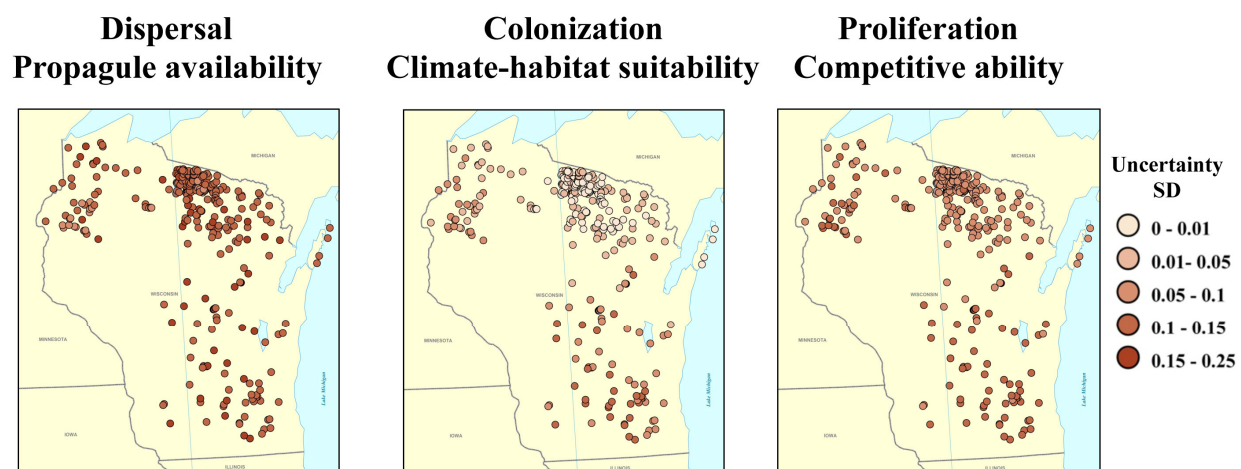

**FIG. A5.** Uncertainty estimates for each of the phases of *Orconectes* invasion, as standard deviations around the mean posterior values from the integrated model.

## Climate envelope model

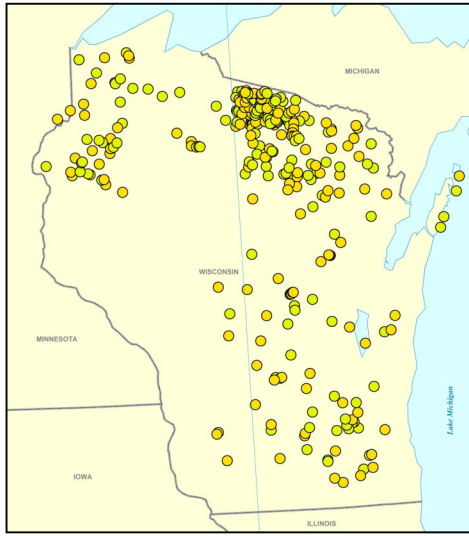

## Integrated model

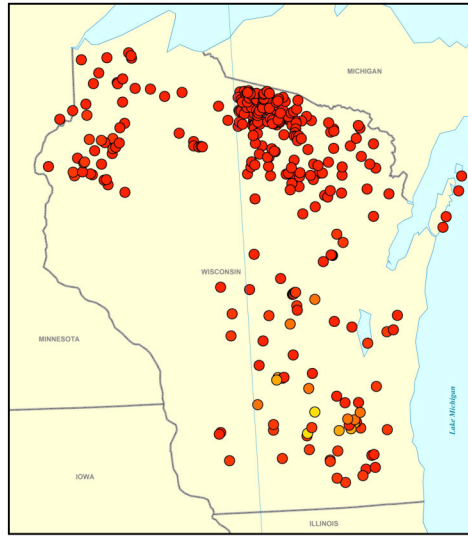

### Likelihood

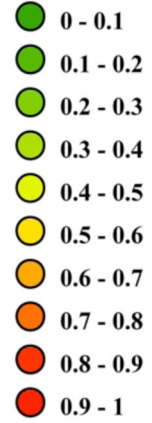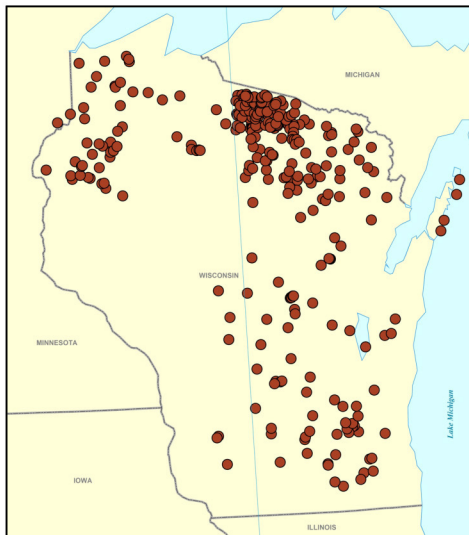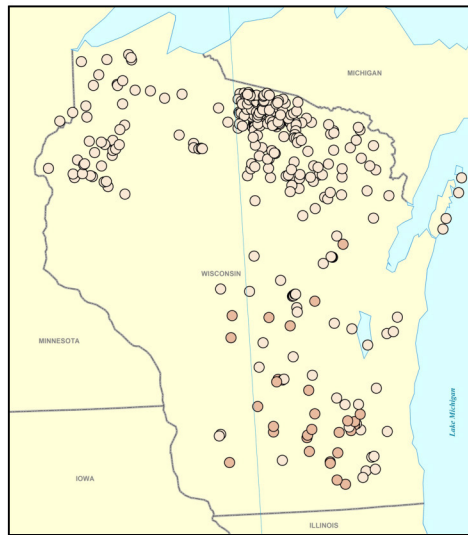

### Uncertainty SD

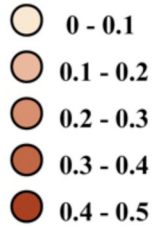

**FIG. A6.** *Orconectes* colonization probabilities for 292 Wisconsin lakes from the climate envelope colonization (left panels) and integrated (right panels) models. Null model DIC: 405, Integrated model DIC: 324.

## LITERATURE CITED

- Albright, T. P., D. P. Anderson, N. S. Keuler, S. M. Pearson, and M. G. Turner. 2009. The spatial legacy of introduction: *Celastrus orbiculatus* in the southern Appalachians, USA. *Journal of Applied Ecology* 46:1229–1238.
- Becker, B. J., L. A. Levin, F. J. Fodrie, and P. A. McMillan. 2007. Complex larval connectivity patterns among marine invertebrate populations. *Proceedings of the National Academy of Sciences, USA* 104:3267–3272.
- Bownes, S. J., and C. D. McQuaid. 2009. Mechanisms of habitat segregation between an invasive and an indigenous mussel: settlement, post-settlement mortality and recruitment. *Marine Biology* 156:991–1006.
- Bownes, S. J., and C. D. McQuaid. 2010. Mechanisms of habitat segregation between an invasive (*Mytilus galloprovincialis*) and an indigenous (*Perna perna*) mussel: adult growth and mortality. *Marine Biology* 157:1799–1810.
- Braby, C. E., and G. N. Somero. 2006. Following the heart: temperature and salinity effects on heart rate in native and invasive species of blue mussels (genus *Mytilus*). *Journal of Experimental Biology* 209:2554–2566.
- Branch, G. M., F. Odendaal, and T. B. Robinson. 2008. Long-term monitoring of the arrival, expansion and effects of the alien mussel *Mytilus galloprovincialis* relative to wave action. *Marine Ecology-Progress Series* 370:171–183.
- Branch, G. M., and C. N. Steffani. 2004. Can we predict the effects of alien species? A case-history of the invasion of South Africa by *Mytilus galloprovincialis* (Lamarck). *Journal of Experimental Marine Biology and Ecology* 300:189–215.
- Carson, H. S., P. C. Lopez-Duarte, L. Rasmussen, D. Wang, and L. A. Levin. 2010.

- Reproductive timing alters population connectivity in marine metapopulations. *Current Biology* 20:1926–1931.
- Clement, C. R., R. S. Warren, G. D. Dreyer, and P. T. Barnes. 1991. Photosynthesis water relations and fecundity in the woody vines American and Oriental bittersweet *Celastrus scandens* and *Celastrus orbiculatus*. *American Journal of Botany* 78:134–135.
- Cox, C. 1995. Location-scale cumulative odds models for ordinal data: a generalized nonlinear model approach. *Statistics in Medicine* 14:1191–1203.
- de Zwaan, A., P. Cortesi, G. van den Thillart, J. Roos, and K. B. Storey. 1991. Differential sensitivities to hypoxia by two anoxia-tolerant marine molluscs: A biochemical analysis. *Marine Biology* 111:343–351.
- Doherty, S. D., D. Brophy, and E. Gosling. 2009. Synchronous reproduction may facilitate introgression in a hybrid mussel (*Mytilus*) population. *Journal of Experimental Marine Biology and Ecology* 378:1–7.
- Dreyer, G. D., L. M. Baird, and C. Fickler. 1987. *Celastrus scandens* and *Celastrus orbiculatus* - comparisons of reproductive potential between a native and an introduced woody vine. *Bulletin of the Torrey Botanical Club* 114:260–264.
- Ellsworth, J. W., R. A. Harrington, and J. H. Fownes. 2004. Seedling emergence, growth, and allocation of Oriental bittersweet: effects of seed input, seed bank, and forest floor litter. *Forest Ecology and Management* 190:255–264.
- Ellsworth, J. W., R. A. Harrington, and J. H. Fownes. 2004. Survival, growth and gas exchange of *Celastrus orbiculatus* seedlings in sun and shade. *American Midland Naturalist* 151:233–240.
- Gilg, M. R., and T. J. Hilbish. 2003. The geography of marine larval dispersal: coupling genetics

- and fine-scale physical oceanography. *Ecology* 84:2989–2998.
- Gilg, M. R., S. E. Kirby, R. Sullivan, L. W. Knapp, and T. J. Hilbish. 2007. Dispersal vs. retention: correspondence of species-specific reproductive cycles and settlement periods in a blue mussel hybrid zone. *Marine Ecology-Progress Series* 351:151–161.
- Greenberg, C. H., L. M. Smith, and D. J. Levey. 2001. Fruit fate, seed germination and growth of an invasive vine: An experimental test of 'sit and wait' strategy. *Biological Invasions* 3:363–372.
- Hijmans, R. J., S. E. Cameron, J. L. Parra, P. G. Jones, and A. Jarvis. 2005. Very high resolution interpolated climate surfaces for global land areas. *International Journal of Climatology* 25:1965–1978.
- Ibáñez, I., J. A. Silander, J. M. Allen, S. A. Treanor, and A. Wilson. 2009. Identifying hotspots for plant invasions and forecasting focal points of further spread. *Journal of Applied Ecology* 46:1219–1228.
- Ibáñez, I., J. A. Silander, A. M. Wilson, N. LaFleur, N. Tanaka, and I. Tsuyama. 2009. Multivariate forecasts of potential distributions of invasive plant species. *Ecological Applications* 19:359–375.
- Kelly, A. B., C. J. Small, and G. D. Dreyer. 2009. Vegetation classification and invasive species distribution in natural areas of southern New England. *Journal of the Torrey Botanical Society* 136:500–519.
- Kelly, A. B., C. J. Small, and G. D. Dreyer. 2009. Vegetation classification and invasive species distribution in natural areas of southern New England. *Journal of the Torrey Botanical Society* 136:500–519.
- Kopp, J., F. Cornette, and C. Simonne. 2005. A comparison of growth and biochemical

- composition of *Mytilus galloprovincialis* (Lmk.) and *Mytilus edulis* (L.) on the West coast of Cotentin, Normandy, France 1999-2000. *Aquaculture International* 13:327–340.
- Kuhman, T. R., S. M. Pearson, and M. G. Turner. 2010. Effects of land-use history and the contemporary landscape on non-native plant invasion at local and regional scales in the forest-dominated southern Appalachians. *Landscape Ecology* 25:1433–1445.
- Leicht, S. A., and J. A. Silander. 2006. Differential responses of invasive *Celastrus orbiculatus* (*Celastraceae*) and native *C. scandens* to changes in light quality. *American Journal of Botany* 93:972–977.
- Leicht-Young, S. A., J. A. Silander, and A. M. Latimer. 2007. Comparative performance of invasive and native *Celastrus* species across environmental gradients. *Oecologia* 154:273–282.
- Lundgren, M. R., C. J. Small, and G. D. Dreyer. 2004. Influence of land use and site characteristics on invasive plant abundance in the Quinebaug Highlands of southern New England. *Northeastern Naturalist* 11:313–332.
- McCullagh, P. 1980. Regression models for ordinal data. *Journal of the Royal Statistical Society, Series B* 42:109–142.
- McNab, W. H., and D. L. Loftis. 2002. Probability of occurrence and habitat features for oriental bittersweet in an oak forest in the southern Appalachian mountains, USA. *Forest Ecology and Management* 155:45–54.
- McQuaid, C. D., and T. E. Phillips. 2000. Limited wind-driven dispersal of intertidal mussel larvae: in situ evidence from the plankton and the spread of the invasive species *Mytilus galloprovincialis* in South Africa. *Marine Ecology-Progress Series* 201:211–220.
- Menge, B. A., B. A. Daley, E. Sanford, E. P. Dahlhoff, and J. Lubchenco. 2007. Mussel zonation

- in New Zealand: an integrative eco-physiological approach. *Marine Ecology Progress Series* 345:129–140.
- Merhoff, L. J., J. A. Silander Jr., S. A. Leicht, E. S. Mosher, and N. M. Tabak. 2003. IPANE: Invasive Plant Atlas of New England. Department of Ecology & Evolutionary Biology, University of Connecticut, Storrs, CT, USA. URL: <http://www.ipane.org>.
- Mosher, E. S., J. A. Silander Jr., and A. Latimer. 2009. The role of land-use history in major invasions by woody plant species in the northeastern North American Landscape. *Biological Invasions* 11:2317–2328.
- Nicastro, K. R., G. I. Zardi, and C. D. McQuaid. 2010a. Differential reproductive investment, attachment strength and mortality of invasive and indigenous mussels across heterogeneous environments. *Biological Invasions* 12:2165–2177.
- Nicastro, K. R., G. I. Zardi, C. D. McQuaid, L. Stephens, S. Radloff, and G. L. Blatch. 2010b. The role of gaping behaviour in habitat partitioning between coexisting intertidal mussels. *BMC Ecology* 10:17.
- NOOA. 1995–present. National Oceanographic and Atmospheric Administration. Coastal Services Center. The Coastal Change Analysis Program (C-CAP). Charleston, SC: NOAA Coastal Services Center. URL: <http://www.csc.noaa.gov/crs/lca/ccap.html>.
- Olden, J. D., M. J. Vander Zanden, and P. T. J. Johnson. 2011. Assessing ecosystem vulnerability to invasive rusty crayfish (*Orconectes rusticus*). *Ecological Applications* 21:2587–2599.
- Pande, A., C. L. Williams, C. L. Lant, and D. J. Gibson. 2007. Using map algebra to determine the mesoscale distribution of invasive plants: the case of *Celastrus orbiculatus* in Southern Illinois, USA. *Biological Invasions* 9:419–431.

- Petes, L. E., B. A. Menge, and G. D. Murphy. 2007. Environmental stress decreases survival, growth, and reproduction in New Zealand mussels. *Journal of Experimental Marine Biology and Ecology* 351:83–91.
- Phillips, N. E. 2002. Effects of nutrition-mediated larval condition on juvenile performance in a marine mussel. *Ecology* 83:2562–2574.
- PRISM Climate Group. 2012. Oregon State University, <http://prism.oregonstate.edu>, created 4 Feb 2004.
- Rius, M., and C. D. McQuaid. 2006. Wave action and competitive interaction between the invasive mussel *Mytilus galloprovincialis* and the indigenous *Perna perna* in South Africa. *Marine Biology* 150:69–78.
- Rius, M., and C. D. McQuaid. 2009. Facilitation and competition between invasive and indigenous mussels over a gradient of physical stress. *Basic and Applied Ecology* 10:607–613.
- Sara, G., and A. Pusceddu. 2008. Scope for growth of *Mytilus galloprovincialis* (Lmk., 1819) in oligotrophic coastal waters (Southern Tyrrhenian Sea, Italy). *Marine Biology* 156:117–126.
- Schneider, K. R. 2008. Heat stress in the intertidal: comparing survival and growth of an invasive and native mussel under a variety of thermal conditions. *Biological Bulletin* 215:253–264.
- Schneider, K. R., and B. Helmuth. 2007. Spatial variability in habitat temperature may drive patterns of selection between an invasive and native mussel species. *Marine Ecology-Progress Series* 339:157–167.
- Shields, J. L., P. Barnes, and D. D. Heath. 2008. Growth and survival differences among native, introduced and hybrid blue mussels (*Mytilus* spp.): genotype, environment and interaction

- effects. *Marine Biology* 154:919–928.
- Shinen, J. S., and S. G. Morgan. 2009. Mechanisms of invasion resistance: competition among intertidal mussels promotes establishment of invasive species and displacement of native species. *Marine Ecology-Progress Series* 383:187–197.
- Silveri, A., P. W. Dunwiddie, and H. J. Michaels. 2001. Logging and edaphic factors in the invasion of an Asian woody vine in a mesic North American forest. *Biological Invasions* 3:379–389.
- Spiegelhalter, D. J., N. Best, B. P. Carlin, and A. V. D. Linde. 2000. Bayesian measures of model complexity and fit. *Journal of the Royal Statistical Society: Series B (Statistical Methodology)* 64:583–639.
- Thomas, A., R. O'Hara, U. Ligges, and S. Sturts. 2006. Making BUGS Open. *R News* 6:12–17.
- Tibbetts, T. J., and F. W. Ewers. 2000. Root pressure and specific conductivity in temperate lianas: Exotic *Celastrus orbiculatus* (*Celastraceae*) vs. native *Vitis riparia* (*Vitaceae*). *American Journal of Botany* 87:1272–1278.
- Wang, G. 2005. Agricultural drought in a future climate: results from 15 global climate models participating in the IPCC 4th assessment. *Climate Dynamics* 25:739–753.
- Xavier, B. M., G. M. Branch, and E. Wieters. 2007. Abundance, growth and recruitment of *Mytilus galloprovincialis* on the west coast of South Africa in relation to upwelling. *Marine Ecology Progress Series* 346:189–201.
- Zardi, G. I., K. R. Nicastro, C. D. McQuaid, and J. Erlandsson. 2008. Sand and wave induced mortality in invasive (*Mytilus galloprovincialis*) and indigenous (*Perna perna*) mussels. *Marine Biology* 153:853–858.
- Zardi, G. I., K. R. Nicastro, C. D. McQuaid, M. Rius, and F. Porri. 2006. Hydrodynamic stress

and habitat partitioning between indigenous (*Perna perna*) and invasive (*Mytilus galloprovincialis*) mussels: constraints of an evolutionary strategy. Marine Biology 150:79–88.
